# Supplementary material
Source: PubMed Central journal article supplement (PMC7116848)

# Supplementary Figure 1: Sequence Alignment of Mgm1 Proteins

|        | Mitochondrial Signal Sequence |                                                                                                                     |            | MPP cleavage |            |            |            |    |
|--------|-------------------------------|---------------------------------------------------------------------------------------------------------------------|------------|--------------|------------|------------|------------|----|
|        | xxxxxxx                       | xxxx                                                                                                                |            |              |            |            |            |    |
| ctMgm1 | MSAQLRAAAA                    | ITPAAR                                                                                                              | -----RVISG | PAAVRRFHYY   | HHLPTGGIQR | VEIAARGLRR | SVQFPALANA | 61 |
| atMgm1 | MSGRILSHR                     | --- <td>-----LLRTG</td> <td>NL-A-RHMHN</td> <td>AGARTGGLLR</td> <td>ADGGAALRGR</td> <td>SW--PVGANA</td> <td>53</td> | -----LLRTG | NL-A-RHMHN   | AGARTGGLLR | ADGGAALRGR | SW--PVGANA | 53 |
| ciMgm1 | MSGRLLSRS                     | ---SAL                                                                                                              | -----LSRRS | ALAARLLHHA   | GGIQSGGLLR | TQNGYYLRA  | RLPSVIRQNW | 57 |
| kmMgm1 | -----                         | -----                                                                                                               | -----      | -----        | -----      | -----      | -----      | 1  |
| scMgm1 | ---MNASPVR                    | LLILRRQLAT                                                                                                          | HPAILYSSPY | IKSPLVHLHS   | R-----     | -----MSNVH | RS---AHANA | 50 |
| caMgm1 | -----                         | -----                                                                                                               | -----MIY   | RNGGRLLTHG   | RHIPLQSF   | -----ALLRT | AR---VHTQL | 33 |
| psMgm1 | -----                         | -----                                                                                                               | -----      | -----        | -----      | -----      | -----      | 1  |
| cjMgm1 | MSRVGPLRRH                    | AGPLRCQVGL                                                                                                          | NVKMSLTRY  | TRHHRFLSN    | -----T     | -----SLIMS | SN---AKQMV | 52 |
| ppMgm1 | ---MLPRSRH                    | MVPMR                                                                                                               | -----RT    | -----FG      | -----V     | -----RLIQH | QI---PKQI  | 30 |

|        | Start L-Mgm1 | Transmembrane Helix |            |            |            |            |            |     |
|--------|--------------|---------------------|------------|------------|------------|------------|------------|-----|
| ctMgm1 | YHNNAVIVRN   | ASFTRLPKL           | ALKFIRVPAL | FGMMLGAVG  | WVQYQAIKVS | NSAQEFYGNL | KATVADTAFS | 131 |
| atMgm1 | -IHNVPAVRA   | ISFSRMLPKL          | ALKLVRVPAM | LGGATVAGLA | YFOYQATQAG | NYAMDVLRRA | GETAGGAAST | 122 |
| ciMgm1 | -IHNVPAVRT   | ISFARIIPKL          | AMKLVRVPAM | FGGAMTAGLA | YLOYQASQAG | NYVIDFKSA  | GETAGGIASS | 126 |
| kmMgm1 | -----        | -----M              | IGKVIRIPAY | IGGGAAALGS | YVAYKVNQAG | SFTGEQLSKF | KDFTGDMRER | 51  |
| scMgm1 | -LSFVI--TR   | RSI-SHFPKI          | ISKIIRLPY  | VGGGMAAAGS | YIAYKMEEAS | SFTKDKLDRI | KDLGSEMKEK | 116 |
| caMgm1 | -K-YIPTYTP   | TRN-LGFQKI          | VTRVVKMPAY | VGGAMAAGGS | YVAYKVEQAS | SFTQDKLSAL | KDISEGFFDK | 100 |
| psMgm1 | -----        | MRH-IGFKI           | LAKTTRIPAY | VGGTLAAGGS | YVAYKVEQAS | TYTQDQLSSI | KDFTQGVFDT | 59  |
| cjMgm1 | -LPMGLKSR    | FSF-SAIIPKI         | VAKSVKVPAY | LGGGIAAAGS | YIAYKVEEAS | NYTQDKLGQL | KDLGNSAYDK | 120 |
| ppMgm1 | -QFGLIKTRP   | FSI-YSECFK          | AGRVVKAPAA | VGGGLAAGS  | YVAYKVEQAS | SYTKDQVDR  | KDLGGLYDN  | 98  |
| ctMgm1 | VWSSAVDIAE   | QTKRGWENTK          | NQFEIPEWLD | RIMKGEGLAG | EGSGSGEGGP | NGGPEPPROS | RAGAATVAGA | 201 |
| atMgm1 | LFSEIQGVAE   | QTORGWQKTT          | EDIEVPEWLQ | KILRMDEAAQ | SGGGSS---  | -GGGQPPNES | RVGASTAAGA | 188 |
| ciMgm1 | AIQGIQGVAE   | QTORGWERTT          | EGIELPEWAO | KILRLEEHA  | KNGGGSGSDG | AGGSGGPKKS | RIGAAGVAGA | 196 |
| kmMgm1 | -----        | -----               | ---LGDWLQ  | ---KDGQSG  | DGGNN----- | -----SNNN  | GSDTVA---  | 78  |
| scMgm1 | -----        | -----               | ---FNKMF   | ---GDKSQD  | GGHGN----- | -----      | -DGTVP---  | 138 |
| caMgm1 | -----        | -----               | ---TGDFFK  | ---GLGTTD  | GS--G---S  | NGGQQGGDN  | GGGATA-AGA | 135 |
| psMgm1 | -----        | -----               | ---AGDFK   | ---GMGKS   | SESG---S   | SGGSGSPGS  | NDTTTA-VGA | 96  |
| cjMgm1 | -----        | -----               | ---ASEFLN  | ---GLEFGS  | QGDGS---G  | S-GSSGNGGG | GGDSTA-ALG | 156 |
| ppMgm1 | -----        | -----               | ---ISGFFG  | ---KFG--G  | ---N---G   | S-EGVPPDN  | GSNAAA-LGG | 128 |

|        | Start S-Mgm1 | α1 <sup>B</sup> |            |            |            |            |            |     |
|--------|--------------|-----------------|------------|------------|------------|------------|------------|-----|
| ctMgm1 | S-ATVYGYGA   | SDN-----        | -----      | -----DDR   | -TPEEIMRDD | NMMFITKMI  | EIRNLLQVYG | 245 |
| atMgm1 | AAGSVLYGEQ   | SDE-----        | -----      | -----EDQ   | RLKRDMAEND | QMMILTRMI  | EIRNLLQTVG | 234 |
| ciMgm1 | TTGSALGYDS   | TDD-----        | -----      | -----EVA   | EGR--RAVDE | QMMILTRMI  | EIRNMLORIG | 240 |
| kmMgm1 | -AATLIASMS   | DDESDKKT        | KEG-E--DDD | EDDEDEEDE  | NDETEDNTQD | EMLNLTROMI | EIRSILAKVD | 144 |
| scMgm1 | -TATLIATS    | LDDDE-SKRQ      | GDP-K--DDD | DEDDDD-EDD | ENDSVDTTQD | EMLNLTROMI | EIRTIILKVD | 202 |
| caMgm1 | -AAAAGFTS    | DEGEST--TA      | ESDLEEDDE  | ETLIE-DEDE | EDFENDETD  | HMLNLTROMI | EIRNLLTIN  | 201 |
| psMgm1 | -TAAALGLTS   | EDENEDEDE       | NDDLAQDEDE | ETLYNDYDD  | DDLENETSN  | EMLNLTROMI | EIRNLLASID | 165 |
| cjMgm1 | -TAAATAAKL   | DEEEEREK-       | -LIEQED--  | -----D     | EEEEEDTTDD | QMMNLTROMI | EIRSLLOEID | 211 |
| ppMgm1 | -TAAAVGFKS   | DDDEDEETL       | --YLDEDE-- | -----DEE   | EEEDSETMDD | EMLNLTROMI | EIRSILQSID | 186 |

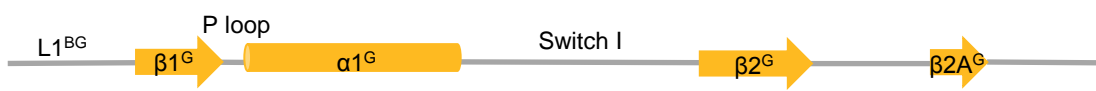

|        |            |            |             |            |            |            |            |     |
|--------|------------|------------|-------------|------------|------------|------------|------------|-----|
| ctMgm1 | QG-STVTLPS | IVVIGSQSSG | KSSVLEAIVG  | HEFLPKGSNM | ITRRPIELIL | VNDPEAKVDY | GEFPDLGLAR | 314 |
| atMgm1 | QS-NTLTLPS | IVVIGSQSSG | KSSVLEAIVG  | HEFLPKGSNM | VTRRPIELIL | VNTPNGQAEY | GEFPALGLGK | 303 |
| ciMgm1 | QS-NSLTLPS | IVVIGSQSSG | KSSVLEAIVG  | HEFLPKGNM  | VTRRPIELIL | INTPNSQAEY | GEFPALGLGK | 309 |
| kmMgm1 | SSSANLTLPS | IVVIGSQSSG | KSSVLESIVG  | KDFLPKGSNM | VTRRPIELIL | VNTPNSQET  | ADFPALRLYN | 214 |
| scMgm1 | SSSAHLTLPS | IVVIGSQSSG | KSSVLESIVG  | REFLPKGSNM | VTRRPIELIL | VNTPNSNVIT | ADFPMLRYN  | 272 |
| caMgm1 | H--DGIRLPS | IVVIGSQSSG | KSSVLECTIVG | QEFLPKGSNM | VTRRPIELIL | VNTPAAANV  | AEFPALKMFN | 269 |
| psMgm1 | H--DGLRLPS | IVVIGSQSSG | KSSVLEAIVG  | QEFLPKGSNM | VTRRPIELIL | INTPEAAADV | AEFPALKMHN | 233 |
| cjMgm1 | RSSETLKLPS | IVVIGSQSSG | KSSVLEAIVG  | QEFLPKGSNM | VTRRPIELIL | VNTPNTAAET | ADFPALKMYN | 281 |
| ppMgm1 | PNDNTLKLPS | IVVIGSQSSG | KSSVLEAVVG  | REFLPKGSNM | VTRRPIELIL | VNSPDLAEEV | AEFPALRYNN | 256 |

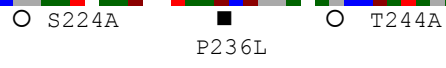

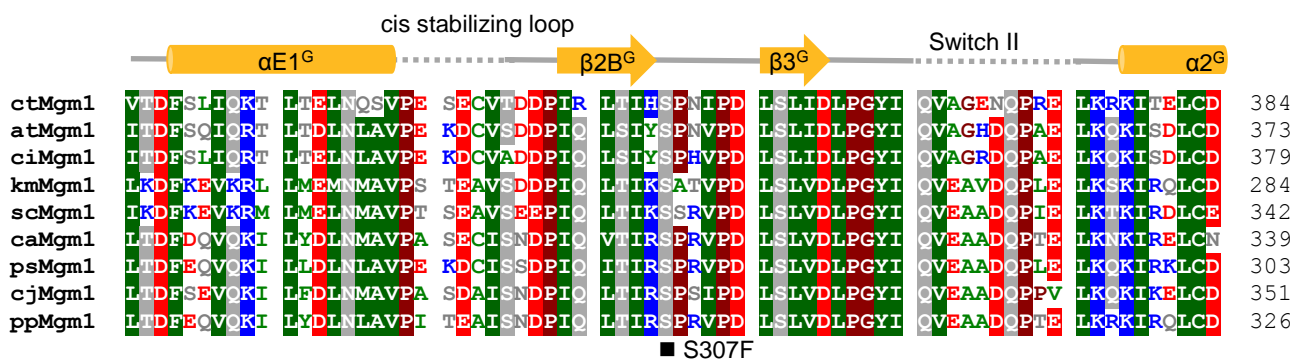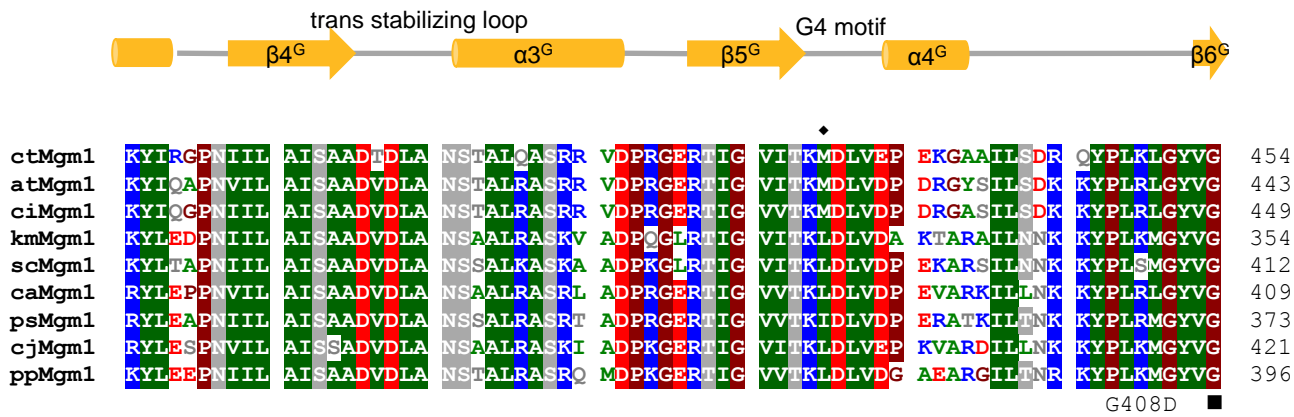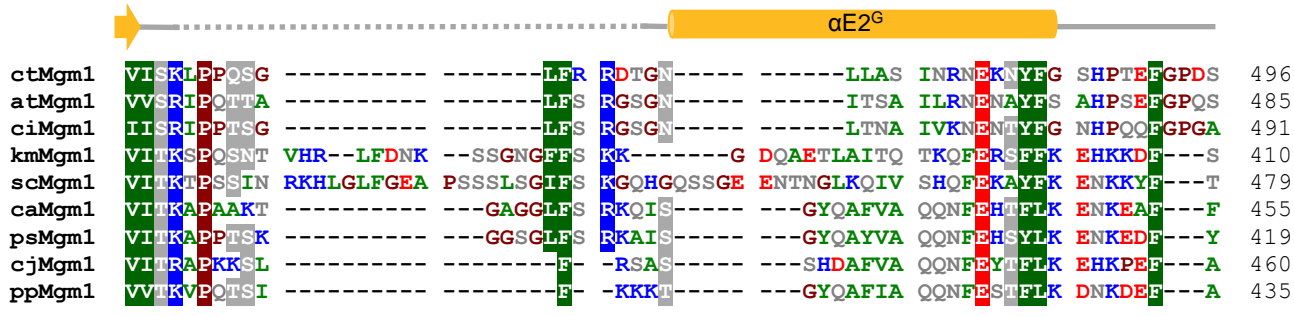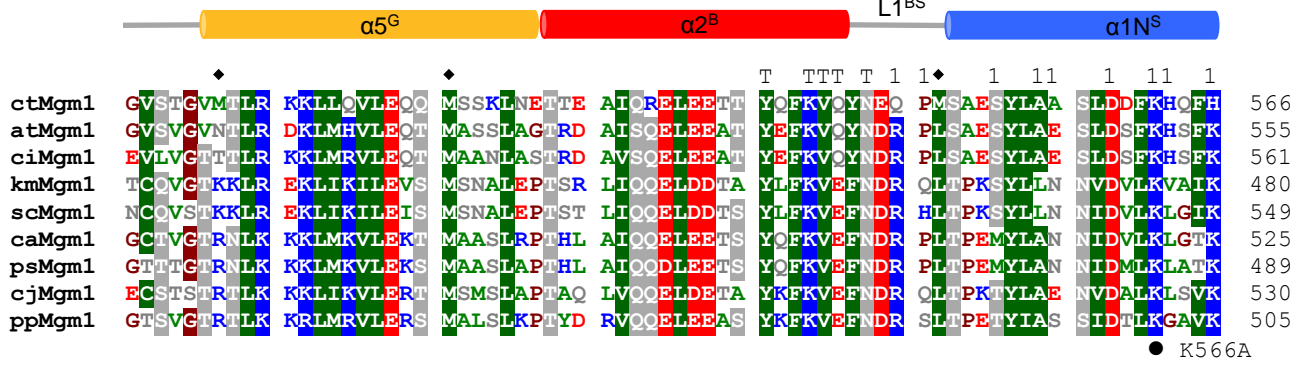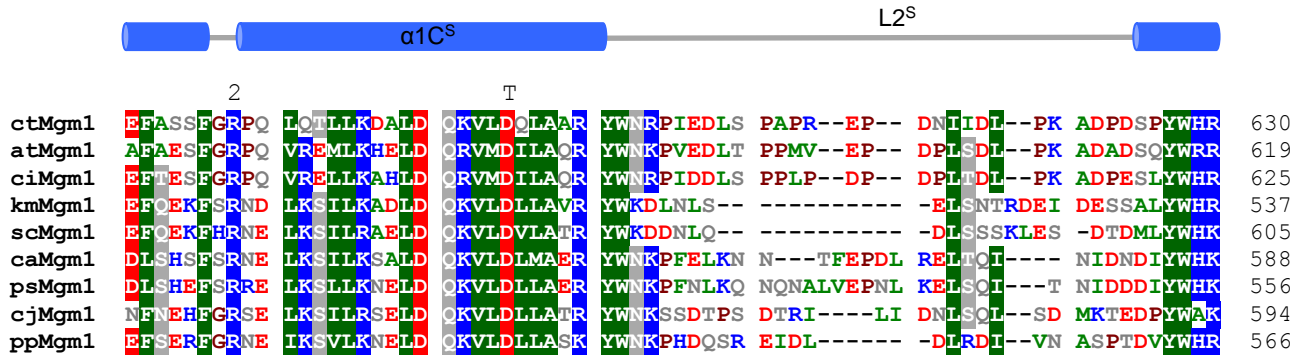

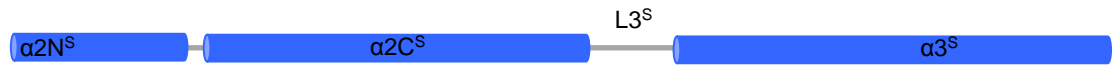

|        | T          | T          | T          |            |             |            |            |  | 1 | T | T2 |     |
|--------|------------|------------|------------|------------|-------------|------------|------------|--|---|---|----|-----|
| ctMgm1 | QLDTACSGLT | RLGVGRLAAT | VAASAIQOHV | EKLLDKSSFA | KHPSARKVIS  | DAAATVLADR | SYATSDGTEI |  |   |   |    | 700 |
| atMgm1 | KLDASTSALT | KLIGIRLAAT | VVANAIQSHV | DRLLANSTFA | THPYAQKQIE  | DAYTSILADR | FFSTSDOVEN |  |   |   |    | 689 |
| ciMgm1 | KLDASSSALT | KLIGIRLAAT | VVANALQNRV | DDLIACSTFA | SHPYAQKATG  | DATTSILADR | FFSTSDOVEN |  |   |   |    | 695 |
| kmMgm1 | KLELAQSSLT | KIGVGRLSST | LVTNAIIQEL | TNIIINQSQR | NHDLIKELVT  | NTAVNVLNSK | YYSTADOVEN |  |   |   |    | 607 |
| scMgm1 | KLELASSGLT | KMGIGRLSTM | LITNAILKEI | DNILESTQK  | NHELIIKDLVS | NTAINVLNSK | YYSTADOVEN |  |   |   |    | 675 |
| caMgm1 | KLDLITSSLT | KLGVGRLSST | LITNALLTEV | ENLVDNTQLR | NHPMAKSAVR  | DAAKSVLSNK | YYSTADOVEN |  |   |   |    | 658 |
| psMgm1 | KLDLITSSLT | KMGVGRISST | LVTNALLKEI | ENLVDNTQLR | NHPMAKNAVS  | EAAKTVLGAK | YYSTADOVEN |  |   |   |    | 626 |
| cjMgm1 | KLDLATSSLT | KLGVGRLSST | VIADAIVSEV | GNITDQIQLR | NHPLAKEAVK  | EAAESVLNAR | YLSTADOVEN |  |   |   |    | 664 |
| ppMgm1 | KLDLITNSLT | KLGVGRLSST | LLTNALLTEI | DNMIDNTILR | THPMIKQVVR  | DAAEEVLNSR | YYSTADOVEN |  |   |   |    | 636 |

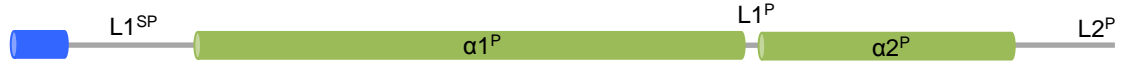

|        | T          | T          |             |            |            |             |            |  |  |  |  |     |
|--------|------------|------------|-------------|------------|------------|-------------|------------|--|--|--|--|-----|
| ctMgm1 | SLKPYKFDPD | IQPNWEAQGR | EHVGVVLOAE  | LEQCQAAMKA | LENSVGGRRK | LKEVMSFVDR  | ARKGEIIVEG |  |  |  |  | 770 |
| atMgm1 | CIKPYKFEIE | VEDPEWAKGR | ENSVKVLKEE  | LRACEAAYKR | VEESVGGRRK | LKDVMFVDR   | VRKGDVVEG  |  |  |  |  | 758 |
| ciMgm1 | CIKPYKYEIE | VDDFEWTKGR | ENVGKVLKEE  | LKACESALKH | VEDSVGGRRK | LKDVMFVDR   | VRRGDVQVEG |  |  |  |  | 764 |
| kmMgm1 | CIKPFKYEID | LEDRDWSLAQ | EHSIALVKEE  | LRQCNERYNM | IKNGVGSRRK | LSQVVFQKQ   | DPN-----   |  |  |  |  | 669 |
| scMgm1 | CIKPFKYEID | LEERDWSLAR | QHSINLIKKEE | LRQCNSRYQA | IKNAVGSRRK | LANVMGYLEN  | ESNL-----  |  |  |  |  | 738 |
| caMgm1 | CIKPYKYEIE | LEDREWQTSK | ENAVNLLKEE  | MROCDLVYHD | LKSQVGGRRK | LQOVVITYLEK | LKQQQNSDID |  |  |  |  | 727 |
| psMgm1 | CIKPYKYEIE | LEDREWQASK | ENSVRLLKEE  | LRQCDEVYNN | LKKQIGGRRK | LQOVVSYLER  | LKQQQTTDVD |  |  |  |  | 695 |
| cjMgm1 | CIKPYKYEVD | VDSREWSTAR | EQTIIYLKQIE | LQOCQDSFOA | LKNAIGGRRK | LSQVMITYLEE | GGT-----   |  |  |  |  | 726 |
| ppMgm1 | CIKPFKFEIE | LENSEWKQSR | DHIIRLLNEE  | LRSCDOYLQL | LKKNIGSRK  | LTOIMTYLEN  | KDNSIG---E |  |  |  |  | 702 |

● K724A

● K745A

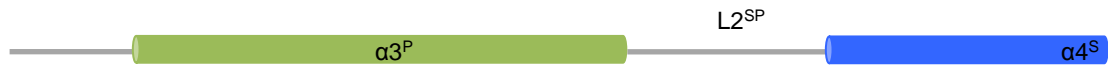

|        | PP         |             |            |            | C           | C          | 2           |     |
|--------|------------|-------------|------------|------------|-------------|------------|-------------|-----|
| ctMgm1 | DHPSGAGGFS | AALLARGREA  | VFLRDRADIL | SLRIQAAK-S | RQCKTLTNKY  | YCPEVFLDAV | ATKLAQTAVL  | 839 |
| atMgm1 | DGAGGAGGFS | SALLAKGRES  | VFLRDRADLI | KMRLLAVR-S | KQCASKKNKY  | YCPEVFLDVV | ADKLTSTAVL  | 827 |
| ciMgm1 | DGTGGAGGFS | AALIQKREG   | AFLRDRADII | KMRLLAVR-S | KQCASKKNKY  | YCPEIFLDVV | ADKLTSTAVL  | 833 |
| kmMgm1 | --RKETLGFS | ALLLERGHEA  | MFLQDRSALL | NFRLKFLKN- | -KCFSVSOKD  | KCPEVFLNAV | SDKLTSTAVL  | 735 |
| scMgm1 | --QKETLGMS | KILLERGSSEA | IFLDRKCKVL | SFRLKMLKN- | -KCHSTIEKD  | RCPEVFLSAV | SDKLTSTAVL  | 804 |
| caMgm1 | LSTNEALGFS | PTLIQRGKDA  | IFLKERLSLL | KMRYQFVKNS | KKCKRKEISKY | QCPEIFLDAV | VTKITNTAVL  | 797 |
| psMgm1 | FNSPEALGFS | PSLIQRGQDA  | IFLKDRLSLL | KMRYSFVKNS | KKCKKKNKY   | QCPEIFLDAV | SDKVTSTTAVL | 765 |
| cjMgm1 | --AEETVGF  | QVLLKRGREA  | LFLDRDSTIL | GMRLKALK-S | GPCKSKDNKF  | KCPEIFLNAV | ADKLTSTAVL  | 793 |
| ppMgm1 | TIERENIGFS | PGILSRGRDA  | LFLKDRAALL | QFRISCLK-S | SQCKIKENKY  | KCPEIFLAAV | ADKLTSTAVL  | 771 |

● K795A

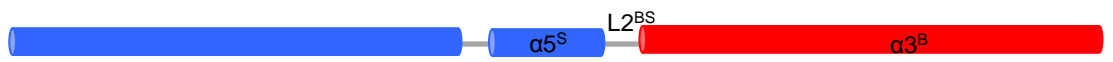

|        | 2          | 22         | 2          | 1          | 1          |            | T          |  |  |  |  |     |
|--------|------------|------------|------------|------------|------------|------------|------------|--|--|--|--|-----|
| ctMgm1 | FLNVEMLNDF | YVRFPREVEA | KLHEHMHAGG | GLEKFAREDP | KVRRHLDLIR | RKELLETVLG | KIEELHRTSS |  |  |  |  | 909 |
| atMgm1 | FLNVELLSEF | YYNFPRELDL | RLGRHLS-DA | EVERFAREDP | RVRKHLDVIR | KKELLELALQ | KIESIROLDG |  |  |  |  | 896 |
| ciMgm1 | FLNVELLSEF | YYHFPRELDL | RLGRHLS-DA | EVERFAREDP | RIRRHLDIQ  | KKEMLELVQ  | KIESLRQLEG |  |  |  |  | 902 |
| kmMgm1 | FLNVELLSDF | FYNFPIELDK | KLS-QLS-DE | QVEMFAKEDS | RIARHIELQK | RKELLELALQ | KIDSILVFRK |  |  |  |  | 803 |
| scMgm1 | FLNVELLSDF | FYNFPIELDR | RLT-LLG-DE | QVEMFAKEDP | KISRHIELQK | RKELLELALQ | KIDSILVFKK |  |  |  |  | 872 |
| caMgm1 | FLNVELLSDF | YYNFPRELDL | KFFSNLS-KD | EIEKLAKEDP | KIKKHIELQE | RKDILENALS | KIESVLAIQR |  |  |  |  | 866 |
| psMgm1 | FLNVELLSDF | YYNFPRELDL | KFFNNLS-KE | EIEKFAKEDP | RIKKHIELQE | RKDLYENALS | KIESVLAIQR |  |  |  |  | 834 |
| cjMgm1 | FLNVELLSDF | FYKFPRELDL | RLNQNL-EE  | QIEQFAKEDP | RIKRHIELQE | RKELLELVLQ | KIDGILAFQR |  |  |  |  | 862 |
| ppMgm1 | FLNVELLSDF | YYNFPRALDA | KLSNGLT-QE | QIEAFKEDP  | KVRRHIELQQ | RKELLELATQ | KIEDVMFLQK |  |  |  |  | 840 |

■ D823N



```

ctMgm1  GTAGTLGLRG AGDLKKRIGA PSSSGRRSFF 939
atMgm1  RSKRNSDRPL PS-----KE QRSRGWNIF- 919
ciMgm1  RSKPNSQQRG SL-----SK ERAKSWRLF- 925
kmMgm1  SYKGLSQPK- ----- 812
scMgm1  SYKGVSKNL- ----- 881
caMgm1  TTQKGGHED- -E-----HK KSVFGW---- 884
psMgm1  TKTTGIVKNE KT-----GG SSIFNWGK-- 856
cjMgm1  SKSSLSSRR- ----- 871
ppMgm1  HRTKH----- ----- 845

```

■ Y874N

### Supplementary Figure 1: Sequence alignment of Mgm1 proteins.

The following sequences were aligned: *Chaetomium thermophilum* (ctMgm1, Uniprot accession number G0SGC7), *Aspergillus terreus* (atMgm1, Q0D0Y9), *Coccidioides immitis* (ciMgm1, J3K1G3), *Kluyveromyces marxianus* (kmMgm1, W0T8X7), *Saccharomyces cerevisiae* (scMgm1, P32266), *Candida tropicalis* (caMgm1, C5M2J4), *Pichia stipites* (psMgm1, A3GGI6), *Pichia jadinii* (cjMgm1, A0A0H5C253), *Komagataella phaffii* / *Pichia pastoris* (ppMgm1, F2QTP9). Amino acids are colour-coded (negative charge D, E: red, positive charge R, K, H: blue, hydrophobic L, I, V, F, Y, W, M, C: gray, P, G: brown) and highlighted if conserved more than 70%. Interface residues with contributions of more than 20 Å<sup>2</sup> are labelled above the alignment (T for tetramer interface, 1,2 for stalk interfaces-1 and 2, respectively). ◆ indicate methionine residues with signal in the anomalous density. The position of temperature-sensitive (■) alleles and nucleotide-binding deficient mutants (○) in *Schizosaccharomyces pombe* Mgm1p according to Wong & Nunnari 2003 and Meussen & Nunnari, 2006 are indicated, as well as membrane-binding deficient mutants in *Saccharomyces cerevisiae* according to Meglei & McQuibban, 2009 (●). L-Mgm1, S-Mgm1 – long and short isoform of Mgm1, MPP – mitochondrial processing peptidase, C-indicates the disulphide bond.

**Uncropped SDS PAGE gels referring to Fig. 1**

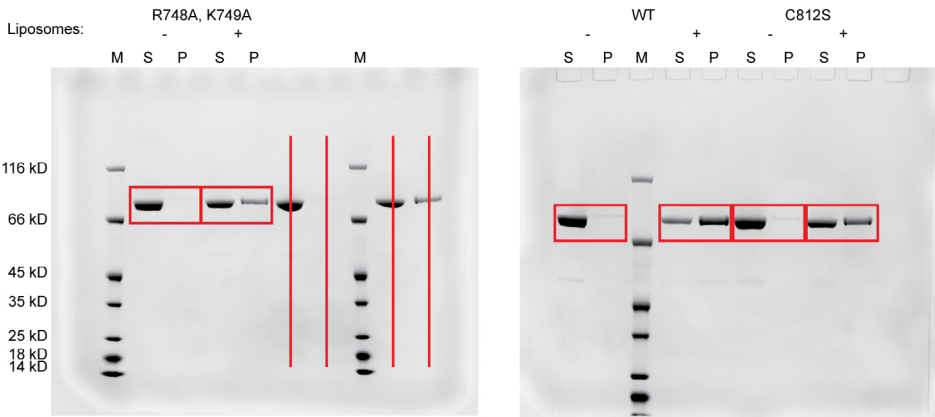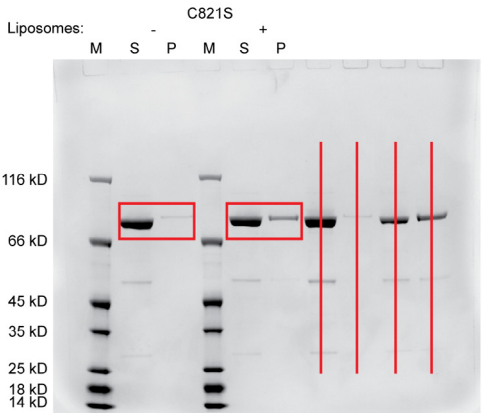

**Uncropped SDS PAGE gels referring to Figure 2**

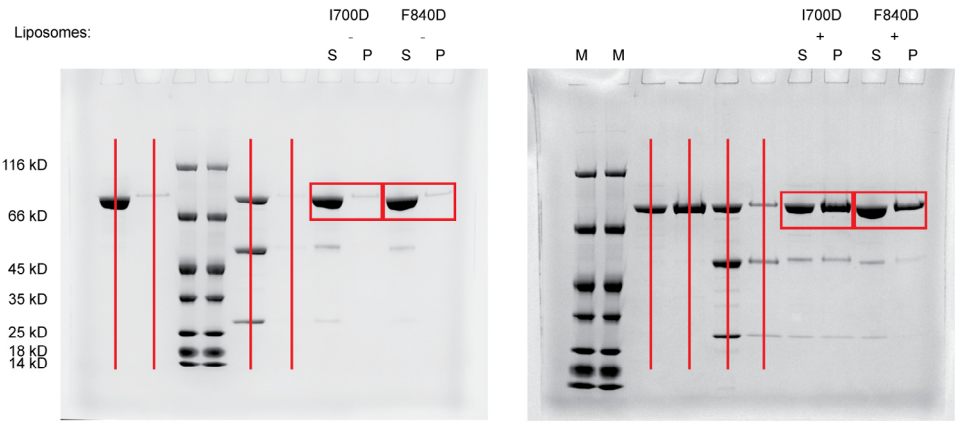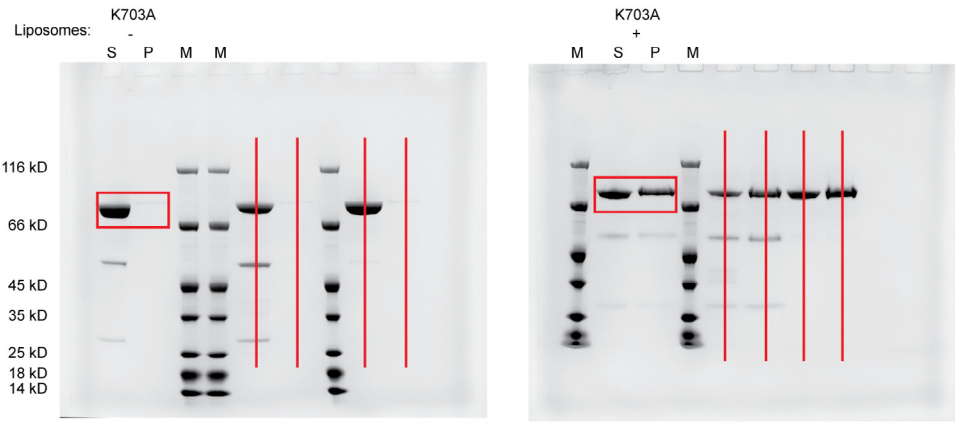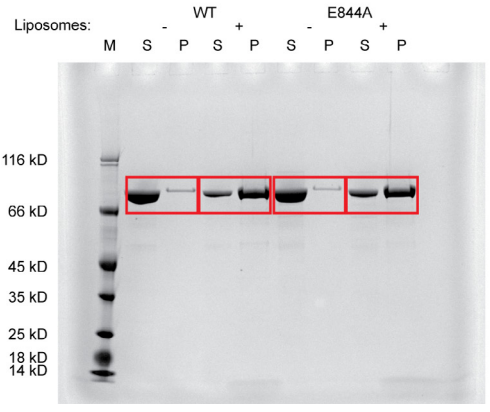



**Uncropped Western blots referring to Extended Data Figure 5**

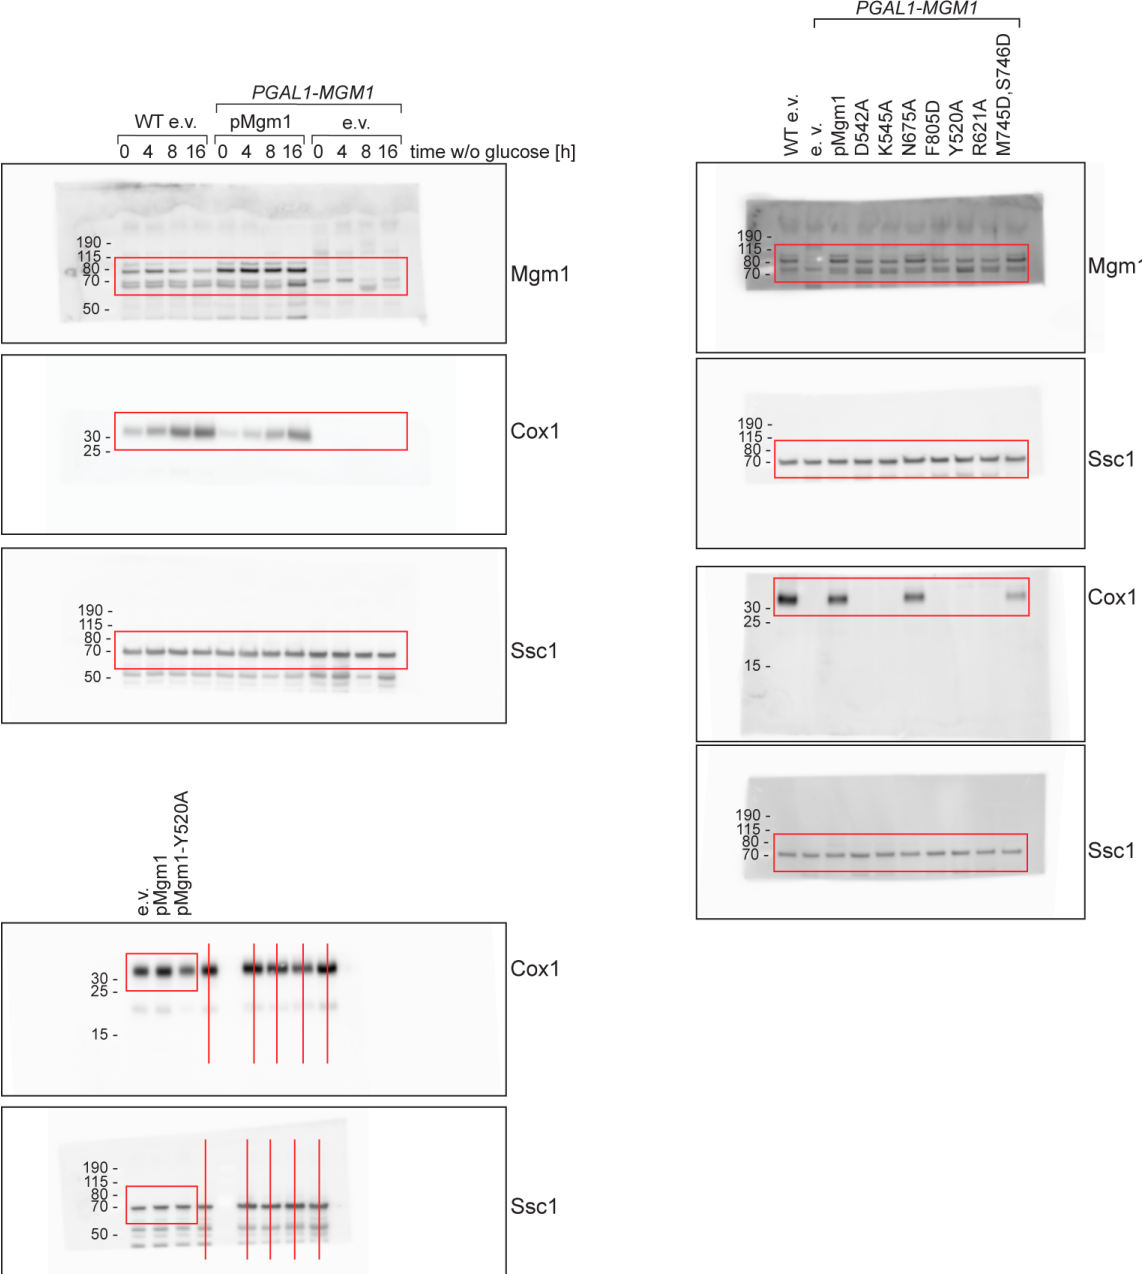

Supplement: EMS116610-supplement-Supplementary_Figures.pdf [file EMS116610-supplement-Supplementary_Figures.pdf]
